# Supplementary material for: The epidemiological characteristics of dengue in high-risk areas of China, 2013–2016
Source: PLoS Negl Trop Dis. 2021 Dec 20;15(12):e0009970. doi: 10.1371/journal.pntd.0009970 (PMC8687583; doi:10.1371/journal.pntd.0009970)
Supplement: S3 Table — (XLSX) [file pntd.0009970.s004.xlsx]

## Sheet: Sheet1
S3 Table. DENV 3 references
Genbank Number	Geographical region	Collection Date
JN697379	Brazil	2006
EU570160	Brazil	2003
EF629373	Brazil	2002
KT758770	Cambodia	2013
MH594936	India	2017
MH594933	India	2017
MH594932	India	2017
MH594931	India	2017
MG721061	India	2016
L11424	India	1984
KY978445	India	2012
KU216208	India	2013
kt758769	India	2013
KP176705	India	2010
JQ686081	India	2009
JQ686079	India	2010
JQ686078	India	2005
JQ686077	India	2005
JQ686070	India	2010
JF968097	India	2010
MH823209	Indonesia	2016
MH173170	Indonesia	2016
MG895290	Indonesia	2016
MG895278	Indonesia	2016
MG895227	Indonesia	2015
MG895217	Indonesia	2014
MG895206	Indonesia	2014
MG895199	Indonesia	2013
L11425	Indonesia	1973
KY709188	Indonesia	2015
KY006150	Indonesia	2015
KY006145	Indonesia	2015
KX646388	Indonesia	2009
KU529754	Indonesia	2015
KT204456	Indonesia	2012
KF709425	Indonesia	2013
FSD15038I	Indonesia	2015
DGD14014I	Indonesia	2014
LC147058	Laos	2014
KY849775	Laos	2010
KY849769	Laos	2010
KF816158	Laos	2013
HG530194	Laos	2012
HG530193	Laos	2012
HG530190	Laos	2012
HG530182	Laos	2012
HG530180	Laos	2012
HG530175	Laos	2012
HG530167	Laos	2012
HG530165	Laos	2012
HG530147	Laos	2012
HG530140	Laos	2011
FSD13146I	Laos	2013
MG895282	Malaysia	2016
MG895265	Malaysia	2016
MG895255	Malaysia	2015
MG895249	Malaysia	2015
MG895244	Malaysia	2015
L11429	Malaysia	1974
KY495820	Malaysia	2016
MG933850	Myanmar	2017
JF968088	Myanmar	2009
EU478409	Myanmar	2006
EU448444	Myanmar	2006
EU448443	Myanmar	2007
DQ518666	Myanmar	2005
AB609590	Philippines	1956
AY146762	Puerto_Rico	1963
AY146761	Puerto_Rico	1977
MG895273	Singapore	2016
KY921907	Singapore	2015
KY921906	Singapore	2015
KX380841	Singapore	2012
KX224295	Singapore	2013
KX224282	Singapore	2013
KX224278	Singapore	2013
KX224276	Singapore	2014
KT758772	Singapore	2013
KR779788	Singapore	2013
JN380808	Singapore	2009
JN030194	Singapore	2007
L11438	Sri_Lanka	1991
JQ411814	Sri_Lanka	1989
GQ252674	Sri_Lanka	1997
FJ189449	Sri_Lanka	1990
L11439	Tahiti	1965
JQ920476	Tahiti	1991
AY744679	Tahiti	1990
MH888332	Thailand	2012
MG895284	Thailand	2016
MG895254	Thailand	2015
MG895251	Thailand	2015
MG895243	Thailand	2015
MG564124	Thailand	2015
MG564118	Thailand	2015
MG564109	Thailand	2014
MG564104	Thailand	2011
L11620	Thailand	1973
L11440	Thailand	1962
KY586817	Thailand	2006
KY586814	Thailand	2006
KY586812	Thailand	2010
KY586810	Thailand	2009
KY586809	Thailand	2009
KY586807	Thailand	2010
KY586806	Thailand	2008
KY586804	Thailand	2007
KY586803	Thailand	2007
KY495823	Thailand	2015
KY234177	Thailand	2015
KY234176	Thailand	2015
KY234175	Thailand	2015
KY234172	Thailand	2012
KT758790	Thailand	2013
KT758740	Thailand	2011
JF968098	Thailand	2010
AY676385	Thailand	1980
AY676380	Thailand	1980
AY676360	Thailand	1974
MH594462	Viet_Nam	2018
KP893717	Viet_Nam	2013
